# Supplementary material
Source: MDPI journal article supplement (https://www.mdpi.com/2071-1050/11/21/5966)
Supplement: s1 [file s1]

# The Role of Small Farm Activities for the Sustainable Management of Agricultural Landscapes: Case Studies from Europe

Martina Slámová <sup>1</sup> and Ingrid Belčáková <sup>2,\*</sup>

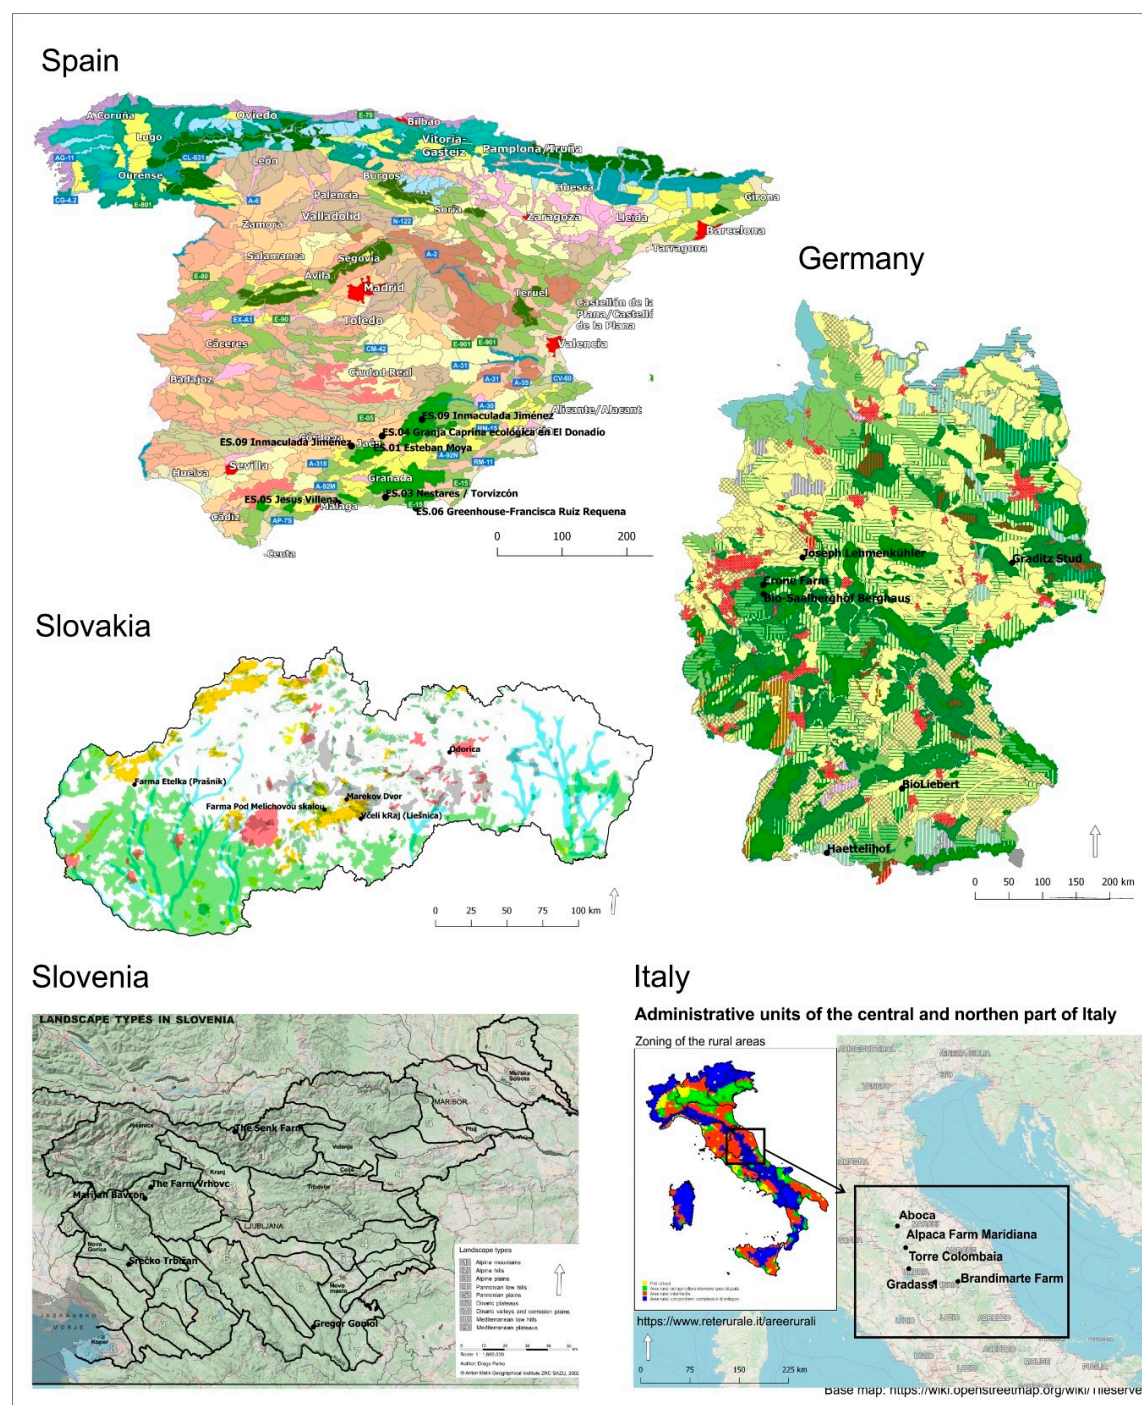

**Figure 1.** National landscape types and location of case studies.
